# Supplementary material for: Independent genome-wide scans identify a chromosome 18 quantitative-trait locus influencing dyslexia
Source: Springer Nature journal article supplement (doi:10.1038/ng792), 2001-12-17
Supplement: ng792-S7.pdf [file ng792-S7.pdf]

---

**Table B • Genetic correlations between reading-related measures**

---

|           | Read | PA   | PD   |
|-----------|------|------|------|
| PA        | 0.70 |      |      |
| PD        | 0.99 | 0.64 |      |
| OC-choice | 0.81 | 0.39 | 0.73 |

---

Genetic correlations for reading-related measures derived from the Colorado twin study of reading disability. Estimates are taken from bivariate DeFries-Fulker regression analyses described in reference 17.

---
